# Supplementary material
Source: publisher site journal article supplement (https://www.spandidos-publications.com/1406/downloadSupplementary)

Figure S1. Transfection efficiency of IN328 determined by reverse transcription-quantitative PCR. \*\* $P < 0.01$  vs. NC. IN328, miR-328 inhibitor; miR, microRNA; NC, negative control.

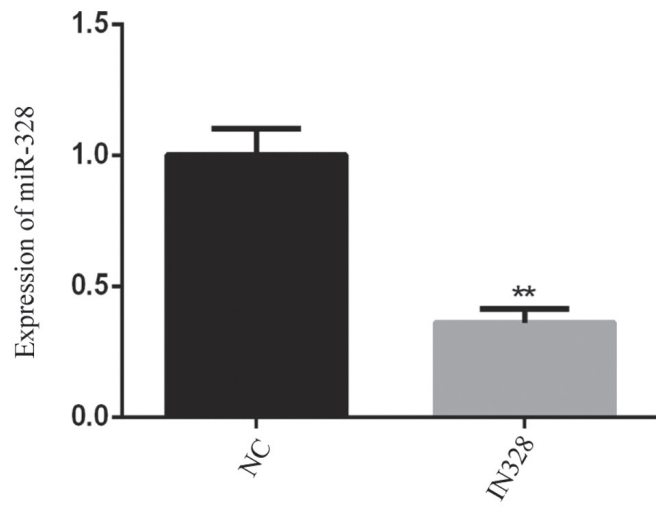

Supplement: Supplementary file 1 [file downloadSupplementary]
